# Supplementary material for: Biofilm-Forming Ability of Microbacterium lacticum and Staphylococcus capitis Considering Physicochemical and Topographical Surface Properties
Source: MDPI journal article supplement (doi:10.3390/foods10030611), 2021-03-13
Supplement: s1 [file s1]

**Table S1:** For cell detachment, scraping and sonication were compared as mean log CFU cm<sup>-2</sup> of *M. lacticum* and *S. capitis* biofilms at 24 h, 48 h, 144 h, and 192 h on SS and PTFE surfaces. <sup>a</sup>

| Growth<br>time<br>[h]                                      | <i>M. lacticum</i> |           |           | <i>S. capitis</i> |           |           |
|------------------------------------------------------------|--------------------|-----------|-----------|-------------------|-----------|-----------|
|                                                            | SS 320             | SS 240    | PTFE      | SS 320            | SS 240    | PTFE      |
| Mean colony count [log CFU cm <sup>-2</sup> ] <sup>b</sup> |                    |           |           |                   |           |           |
| <i>Cell detachment by scraping</i>                         |                    |           |           |                   |           |           |
| 24                                                         | 8.3 ± 0.2          | 8.2 ± 0.3 | 8.3 ± 0.3 | 6.8 ± 0.3         | 6.6 ± 0.2 | 6.2 ± 0.3 |
| 48                                                         | 8.3 ± 0.2          | 8.2 ± 0.2 | 8.3 ± 0.2 | 7.0 ± 0.4         | 7.2 ± 0.4 | 6.0 ± 0.2 |
| 144                                                        | 8.7 ± 0.1          | 8.8 ± 0.0 | 8.8 ± 0.2 | 7.9 ± 0.2         | 8.0 ± 0.1 | 7.8 ± 0.3 |
| 192                                                        | 8.6 ± 0.1          | 8.7 ± 0.1 | 8.6 ± 0.1 | 7.8 ± 0.1         | 8.0 ± 0.2 | 7.9 ± 0.1 |
| <i>Cell detachment by sonication</i>                       |                    |           |           |                   |           |           |
| 24                                                         | 8.0 ± 0.1          | 7.7 ± 0.0 | 8.0 ± 0.6 | 7.5 ± 0.3         | 7.4 ± 0.4 | 7.5 ± 0.5 |
| 48                                                         | 7.8 ± 0.2          | 8.0 ± 0.3 | 8.0 ± 0.1 | 7.4 ± 0.3         | 7.5 ± 0.2 | 7.8 ± 0.1 |
| 144                                                        | 8.6 ± 0.1          | 8.5 ± 0.1 | 8.5 ± 0.1 | 8.4 ± 0.1         | 8.3 ± 0.0 | 8.0 ± 0.0 |
| 192                                                        | 8.5 ± 0.1          | 8.5 ± 0.1 | 8.4 ± 0.1 | 8.4 ± 0.1         | 8.2 ± 0.1 | 7.7 ± 0.1 |

<sup>a</sup> SS 320 (= Stainless steel with a 320 grit), SS 240 (=stainless steel with a 240 grit), PTFE (= polytetrafluoroethylene, Teflon®)

<sup>b</sup> Means ± standard deviation of three independent experiments.
